# Supplementary material for: Measuring the effectiveness of online preparation videos and questions in the second semester general chemistry laboratory
Source: Royal Society of Chemistry journal article supplement (doi:10.1039/d0rp00240b), 2021-01-01
Supplement: d0rp00240b1.pdf [file d0rp00240b1.pdf]

## 1 Student Post-lab Survey

The questions on the post lab survey were as follows:

1. Prior to performing each day's experiment, was the provided instruction (Lab instructor, Lab manual, Friends, SI, Youtube Videos, etc) enough to prepare you to complete each day's task? (Yes/No)
2. Please discuss why you felt that the provided material was enough for you to complete the tasks. (Text answer)
3. Please discuss why you didn't feel that the provided material was enough for you to complete the tasks. (Text answer)
4. Please rank the following materials according to their usefulness in helping you prepare for the lab, where 1 is the most useful and 8 is the least useful. (Mastering Chemistry/Lab Instructor/YouTube Videos/SI/Lecture Materials/Friends/Lab Manual/Titanium Exercises)
5. Please explain why the highest two (1 and 2) in the rankings were the most useful for you to prepare for the lab. (Text answer)
6. Please explain why the lowest two scores (7 and 8) in the ranking were the least helpful for you to prepare for the lab. (Text answer)
7. Please share any improvements to the pre-lab content that would help you prepare more effectively.

## 2 Instructor Survey

The questions on the instructor survey were as follows:

1. How many times have you taught CHEM 120B lab? (Short answer)
2. Do your students complete the preparation exercises before the start of the wet lab? (Yes/No)
3. (If "Yes" was answered in the previous question) What values do you see in having your students to complete the preparation exercises before their lab experience? Be specific. (Text answer)

4. Do your students have access to the videos created for the labs (i.e. kinetics, standardization of NaOH)? (Yes/No)
5. (If "Yes" was answered in the previous question) What values do you see in having your students to complete the preparation exercises before their lab experience? Be specific. (Text answer)
6. Have you use the preparation exercises and/or the videos for training or to be more familiar with the lab?(Yes/No)
7. (If "Yes" was answered in the previous question) Please explain how do you use and what you think about the preparation exercises and the videos as training tools for new TAs. (Text answer)
8. Do you have any comments about the prelab materials and how would you improve them?
